# Supplementary material for: Structural transformation between rutile and spinel crystal lattices in Ru–Co binary oxide nanotubes: enhanced electron transfer kinetics for the oxygen evolution reaction
Source: Royal Society of Chemistry journal article supplement (doi:10.1039/d1nr02244j), 2021-01-01
Supplement: d1nr02244j1.pdf [file d1nr02244j1.pdf]

**Supporting Information for**

**Structural Transformation between Rutile and Spinel Crystal  
Lattices in Ru-Co Binary Oxide Nanotubes: Enhanced Electron  
Transfer Kinetics for Oxygen Evolution Reaction**

*Areum Yu, Myung Hwa Kim, Chongmok Lee, Youngmi Lee\**

Department of Chemistry and Nano Science, Ewha Womans University, Seoul, 03760, Korea

\*Corresponding author: (Fax) [+82-2-3277-2384](tel:+82-2-3277-2384), (E-mail) [youngmilee@ewha.ac.kr](mailto:youngmilee@ewha.ac.kr).

**Table S1.** Lattice constants of RuO<sub>2</sub> rutile structure and Co<sub>3</sub>O<sub>4</sub> cubic structure according to Bragg's law

| Materials                                            | a (RuO <sub>2</sub> , nm) | c (RuO <sub>2</sub> , nm) | a (Co <sub>3</sub> O <sub>4</sub> , nm) |
|------------------------------------------------------|---------------------------|---------------------------|-----------------------------------------|
| RuO <sub>2</sub>                                     | 0.4523                    | 0.3116                    |                                         |
| Ru <sub>0.77</sub> Co <sub>0.23</sub> O <sub>y</sub> | 0.4476                    | 0.3065                    |                                         |
| Ru <sub>0.64</sub> Co <sub>0.36</sub> O <sub>y</sub> | 0.4475                    | 0.3057                    | 0.8142                                  |
| Ru <sub>0.47</sub> Co <sub>0.53</sub> O <sub>y</sub> | 0.4489                    | 0.3060                    | 0.8123                                  |
| Ru <sub>0.33</sub> Co <sub>0.67</sub> O <sub>y</sub> | 0.4486                    | 0.3058                    | 0.8112                                  |
| Ru <sub>0.19</sub> Co <sub>0.81</sub> O <sub>y</sub> | 0.4496                    | 0.3077                    | 0.8108                                  |
| Co <sub>3</sub> O <sub>4</sub>                       |                           |                           | 0.8103                                  |

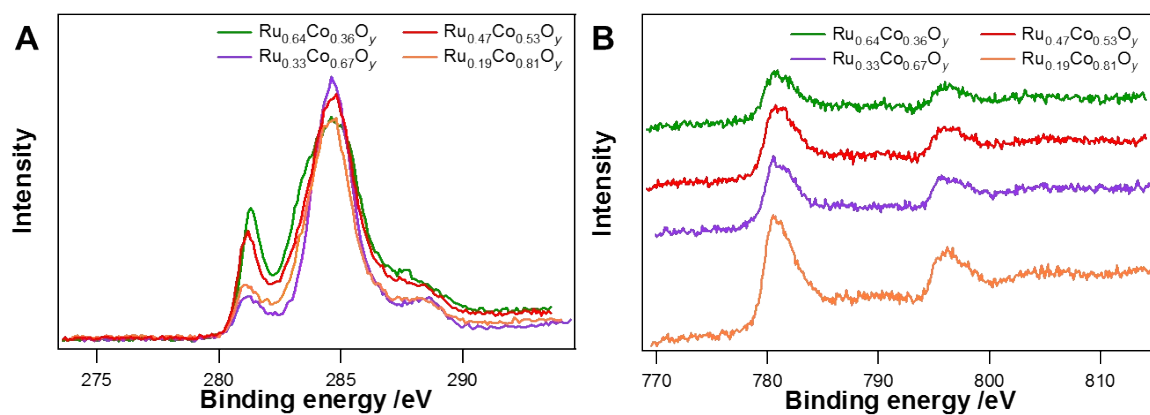

**Figure S1.** High-resolution XPS spectra of (A) Ru 3d and (B) Co 2p regions of Ru<sub>x</sub>Co<sub>1-x</sub>O<sub>y</sub> nanomaterials ( $x = 0.19, 0.33, 0.47$  and  $0.64$ ).

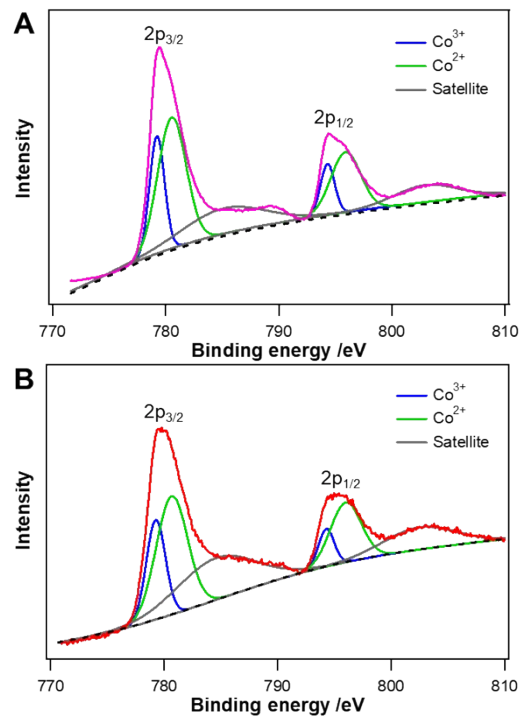

**Figure S2.** High resolution Co 2p XPS spectra of (A) electrospun  $\text{Co}_3\text{O}_4$  nanotubes and (B)  $\text{Ru}_{0.47}\text{Co}_{0.53}\text{O}_y$  nanotubes. The deconvoluted area ratios of  $\text{Co}^{2+}$  to  $\text{Co}^{3+}$  for  $2p_{1/2}$  are 2.46 and 3.11 in  $\text{Co}_3\text{O}_4$  and  $\text{Ru}_{0.47}\text{Co}_{0.53}\text{O}_y$  nanotubes, respectively.

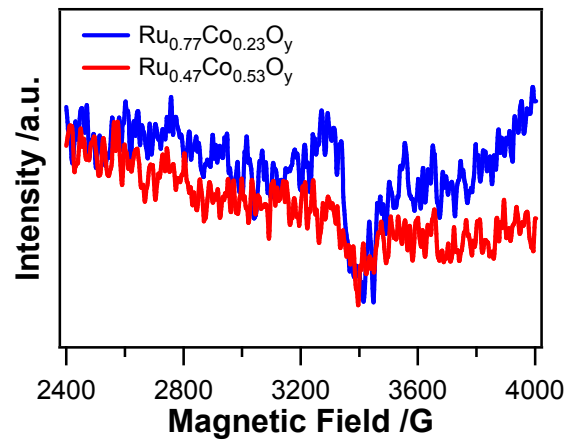

**Figure S3.** Electron paramagnetic resonance (EPR) spectra of  $\text{Ru}_{0.77}\text{Co}_{0.53}\text{O}_y$  and  $\text{Ru}_{0.47}\text{Co}_{0.53}\text{O}_y$ .

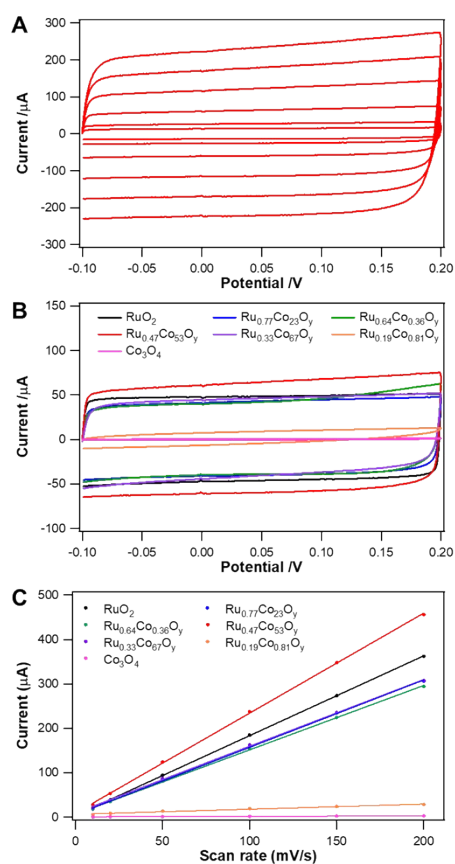

**Figure S4.** (A) Cyclic voltammograms of  $\text{Ru}_{0.47}\text{Co}_{0.53}\text{O}_y$  in 1.0 M  $\text{KNO}_3$  solution at various scan rates of 10, 20, 50, 100, 150, and 200  $\text{mV s}^{-1}$ . (B) Cyclic voltammograms of as prepared  $\text{RuO}_2$ ,  $\text{Ru}_x\text{Co}_{1-x}\text{O}_y$  ( $0 < x < 1$ ) and  $\text{Co}_3\text{O}_4$  nanomaterials obtained at a scan rate of 50  $\text{mV s}^{-1}$ . (C) Plots of anodic and cathodic current differences ( $\Delta i_c$ ) measured at 0.05 V as a function of scan rate.

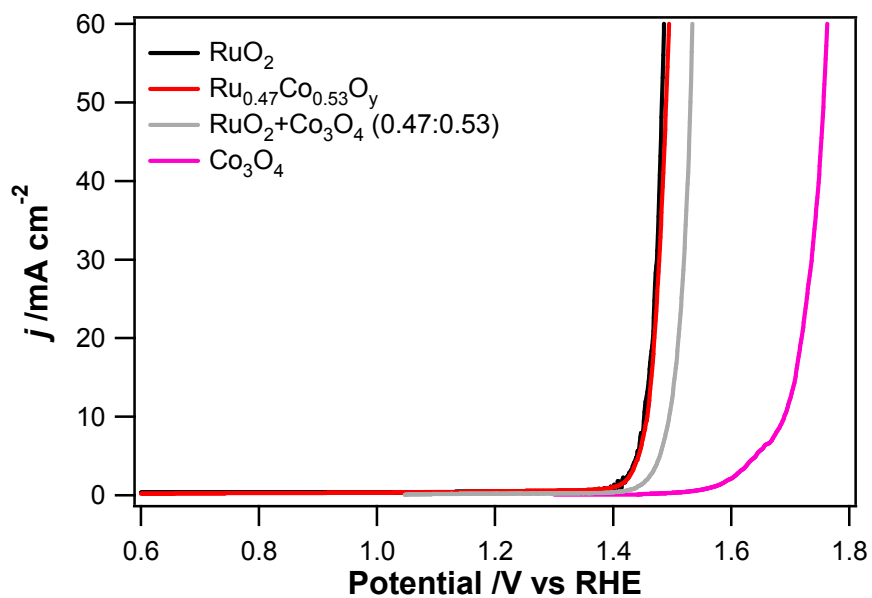

**Figure S5.** *iR*-compensated RDE voltammograms for OER at  $\text{RuO}_2$ ,  $\text{Ru}_{0.47}\text{Co}_{0.53}\text{O}_y$ ,  $\text{Co}_3\text{O}_4$  and physically mixed  $\text{RuO}_2 + \text{Co}_3\text{O}_4$  nanomaterials obtained in Ar-saturated 1.0 M  $\text{HClO}_4$  with a rotation rate of 1600 rpm at a scan rate of  $10 \text{ mV s}^{-1}$ .

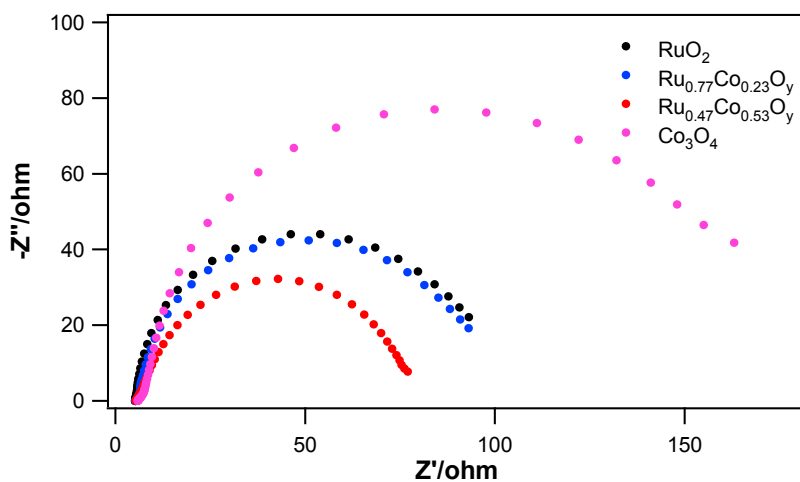

**Figure S6.** Nyquist plots of RuO<sub>2</sub>, Ru<sub>x</sub>Co<sub>1-x</sub>O<sub>y</sub> ( $x = 0.47$  and  $0.77$ ) and Co<sub>3</sub>O<sub>4</sub> nanomaterials measured in 1 M HClO<sub>4</sub> solution at potentials achieving 5 mA cm<sup>-2</sup>.

**Table S2.** Charge-transfer resistance ( $R_{ct}$ ) values of RuO<sub>2</sub>, Ru<sub>x</sub>Co<sub>1-x</sub>O<sub>y</sub> ( $x = 0.47$  and  $0.77$ ) and Co<sub>3</sub>O<sub>4</sub> nanomaterials measured from the Nyquist plots in Figure S6.

| Materials                                            | Resistance ( $\Omega$ ) |
|------------------------------------------------------|-------------------------|
| RuO <sub>2</sub>                                     | 90.9                    |
| Ru <sub>0.77</sub> Co <sub>0.23</sub> O <sub>y</sub> | 86.9                    |
| Ru <sub>0.47</sub> Co <sub>0.53</sub> O <sub>4</sub> | 68.2                    |
| Co <sub>3</sub> O <sub>4</sub>                       | 155.7                   |



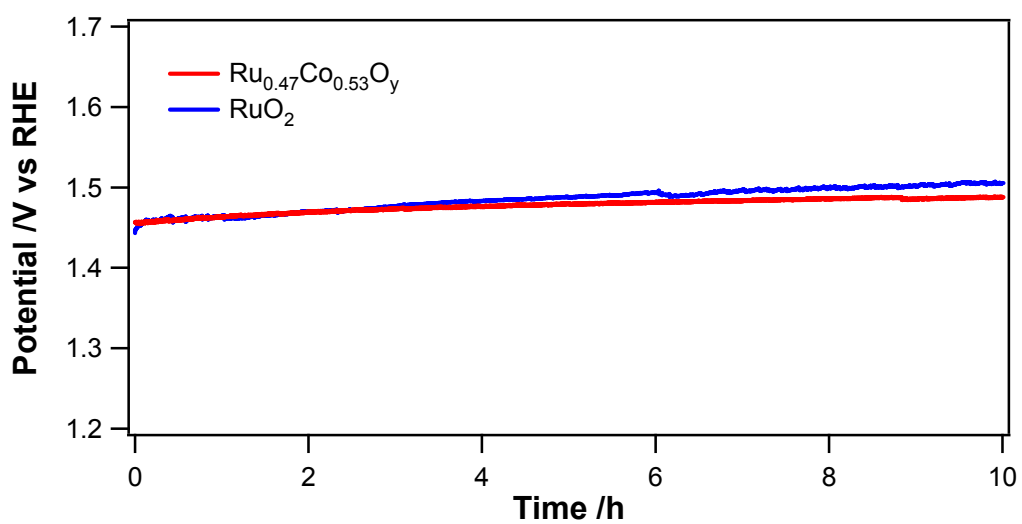

**Figure S7.** Chronopotentiograms of Ru<sub>0.47</sub>Co<sub>0.53</sub>O<sub>y</sub> and RuO<sub>2</sub> obtained with a constant applied current of 10 mA cm<sup>-2</sup> in 0.1 M HClO<sub>4</sub> aqueous solution. Electrodes were not mechanically rotated.

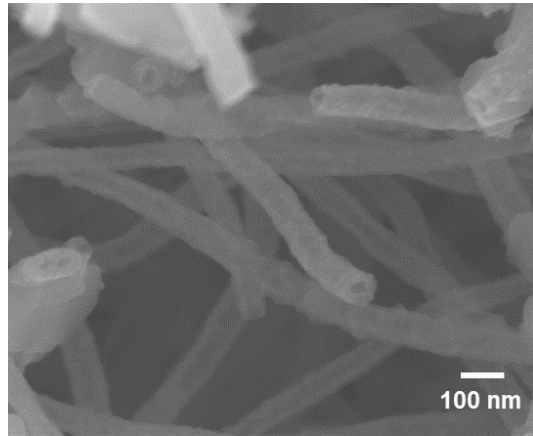

**Figure S8.** A SEM image of Ru<sub>0.47</sub>Co<sub>0.53</sub>O<sub>y</sub> nanotubes after the continuous OER at 10 mA cm<sup>-2</sup> for 8 000 s.

**Table S3.** Comparison of the atomic ratio in  $\text{Ru}_{0.47}\text{Co}_{0.53}\text{O}_y$  before and after the continuous OER at  $10 \text{ mA cm}^{-2}$  for 8 000 s which were determined with SEM-EDS measurements at more than 20 different locations.

| <b>Materials</b>                                                      | <b>Elements</b> | <b>Atomic Ratio (%)</b> |
|-----------------------------------------------------------------------|-----------------|-------------------------|
| $\text{Ru}_{0.47}\text{Co}_{0.53}\text{O}_y$<br>before stability test | Ru              | 46.9 ( $\pm 1.6$ )      |
|                                                                       | Co              | 53.1 ( $\pm 1.6$ )      |
| $\text{Ru}_{0.47}\text{Co}_{0.53}\text{O}_y$<br>after stability test  | Ru              | 46.7 ( $\pm 2.2$ )      |
|                                                                       | Co              | 53.3 ( $\pm 2.2$ )      |

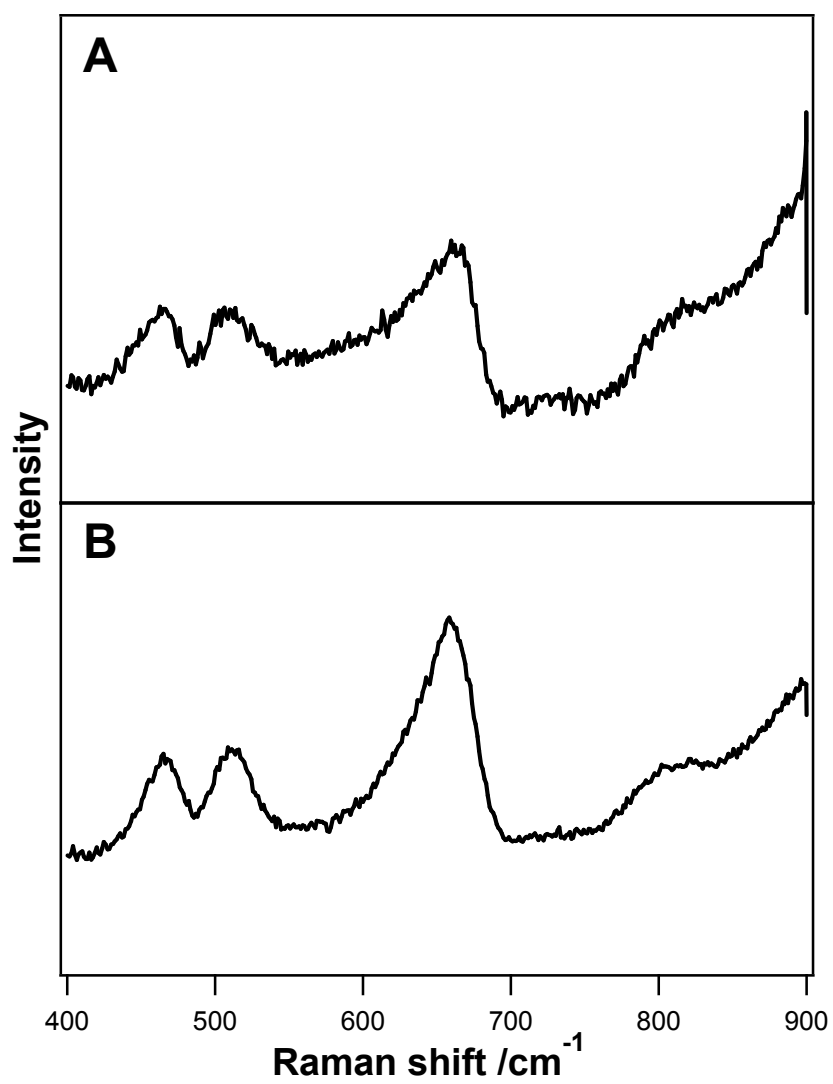

**Figure S9.** Raman spectra for Ru<sub>0.46</sub>Co<sub>0.53</sub>O<sub>y</sub> nanotubes (A) before and (B) after a stability test with a constant applied current of 10 mA cm<sup>-2</sup> for 3600 s.

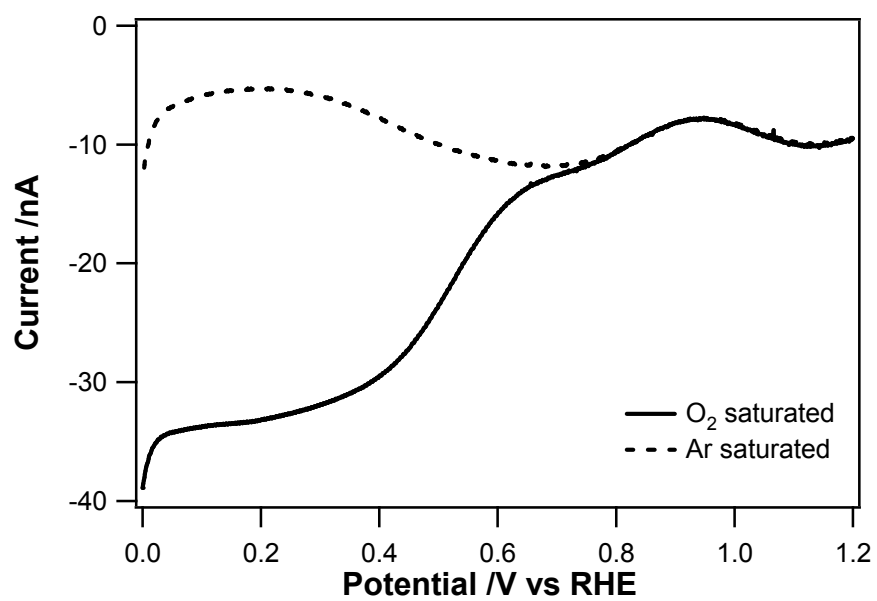

**Figure S10.** LSV for O<sub>2</sub> reduction in O<sub>2</sub>-saturated and Ar-saturated 1.0 M HClO<sub>4</sub> solution at a Pt tip electrode (25 μm in diameter) with a scan rate of 10 mV s<sup>-1</sup>.
